# Supplementary material for: Scale-up Synthesis of (R)- and (S)-N-(2-Benzoyl-4-chlorophenyl)-1-(3,4-dichlorobenzyl)pyrrolidine-2-carboxamide Hydrochloride, A Versatile Reagent for the Preparation of Tailor-Made α- and β-Amino Acids in an Enantiomerically Pure Form
Source: Atypon-hosted journal article supplement (doi:10.1021/acs.oprd.7b00055), 2017-04-13

```

=====
Injection Date   : 10/9/2016 7:07:04 AM      Seq. Line :    1
Sample Name     : 104 final                  Location  : Vial 95
Acq. Operator   : SDRC                      Inj       :    1
                                           Inj Volume: 5 µl

Acq. Method    : C:\HPCHEM\1\METHODS\AGRADP.M
Last changed   : 10/9/2016 5:57:27 AM by SDRC
Analysis Method: C:\HPCHEM\1\METHODS\ZOLNIAAP.M
Last changed   : 10/9/2016 11:15:23 PM by SDRC
SOL Ni AA Method, Positive Mass
=====

```

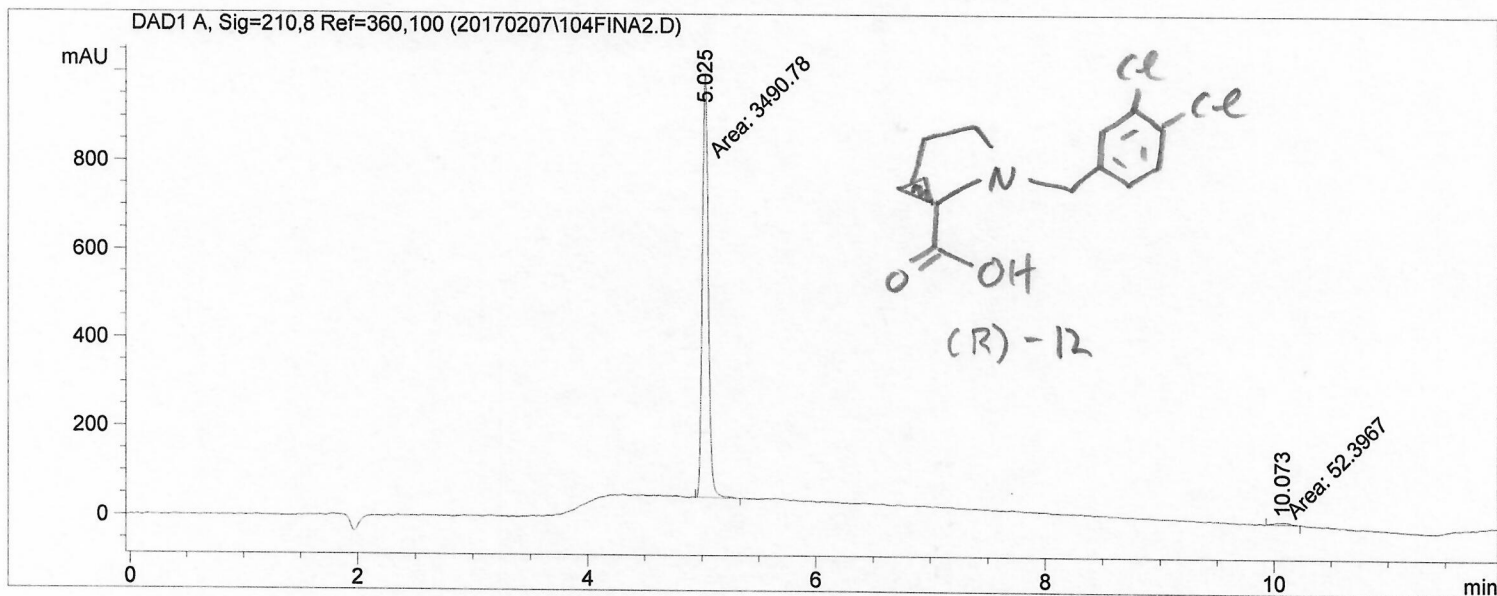

```

=====
                          Area Percent Report
=====

```

```

Sorted By           :      Signal
Multiplier          :      1.0000
Dilution           :      1.0000
Use Multiplier & Dilution Factor with ISTDs

```

Signal 1: DAD1 A, Sig=210,8 Ref=360,100

| Peak # | RetTime [min] | Type | Width [min] | Area [mAU*s] | Height [mAU] | Area %  |
|--------|---------------|------|-------------|--------------|--------------|---------|
| 1      | 5.025         | MM   | 0.0605      | 3490.77954   | 961.76099    | 98.5212 |
| 2      | 10.073        | MM   | 0.1599      | 52.39672     | 5.46170      | 1.4788  |

```
Totals :                      3543.17627  967.22269
```

```

=====
*** End of Report ***

```

(R)-12 Reaction Course

Current Chromatogram(s)

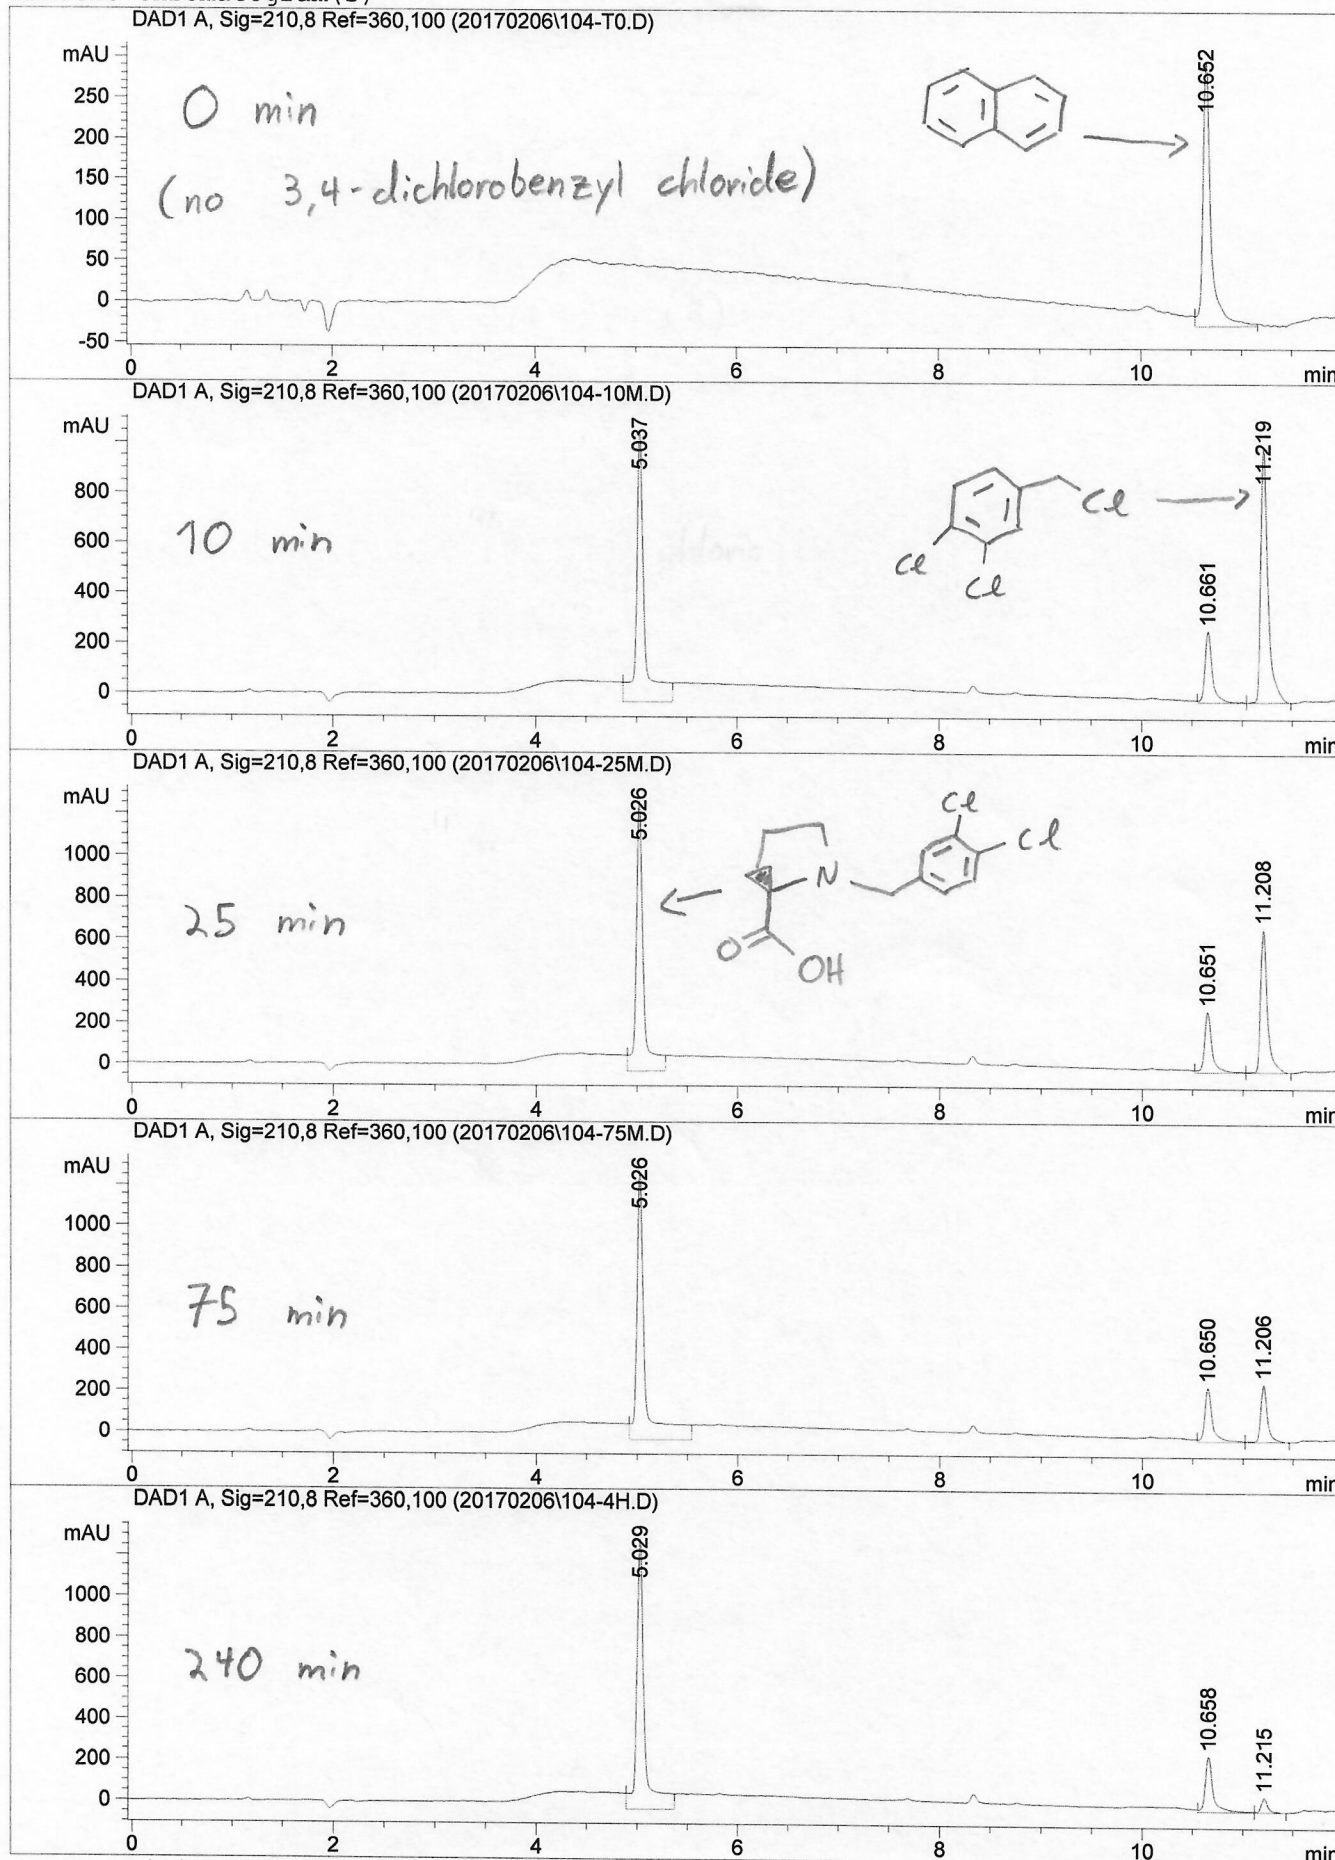

MS Spectrum

\*MSD1 SPC, time=5.077 of 20170207\104FINA2.D API-ES, Pos, Scan, Frag: 100

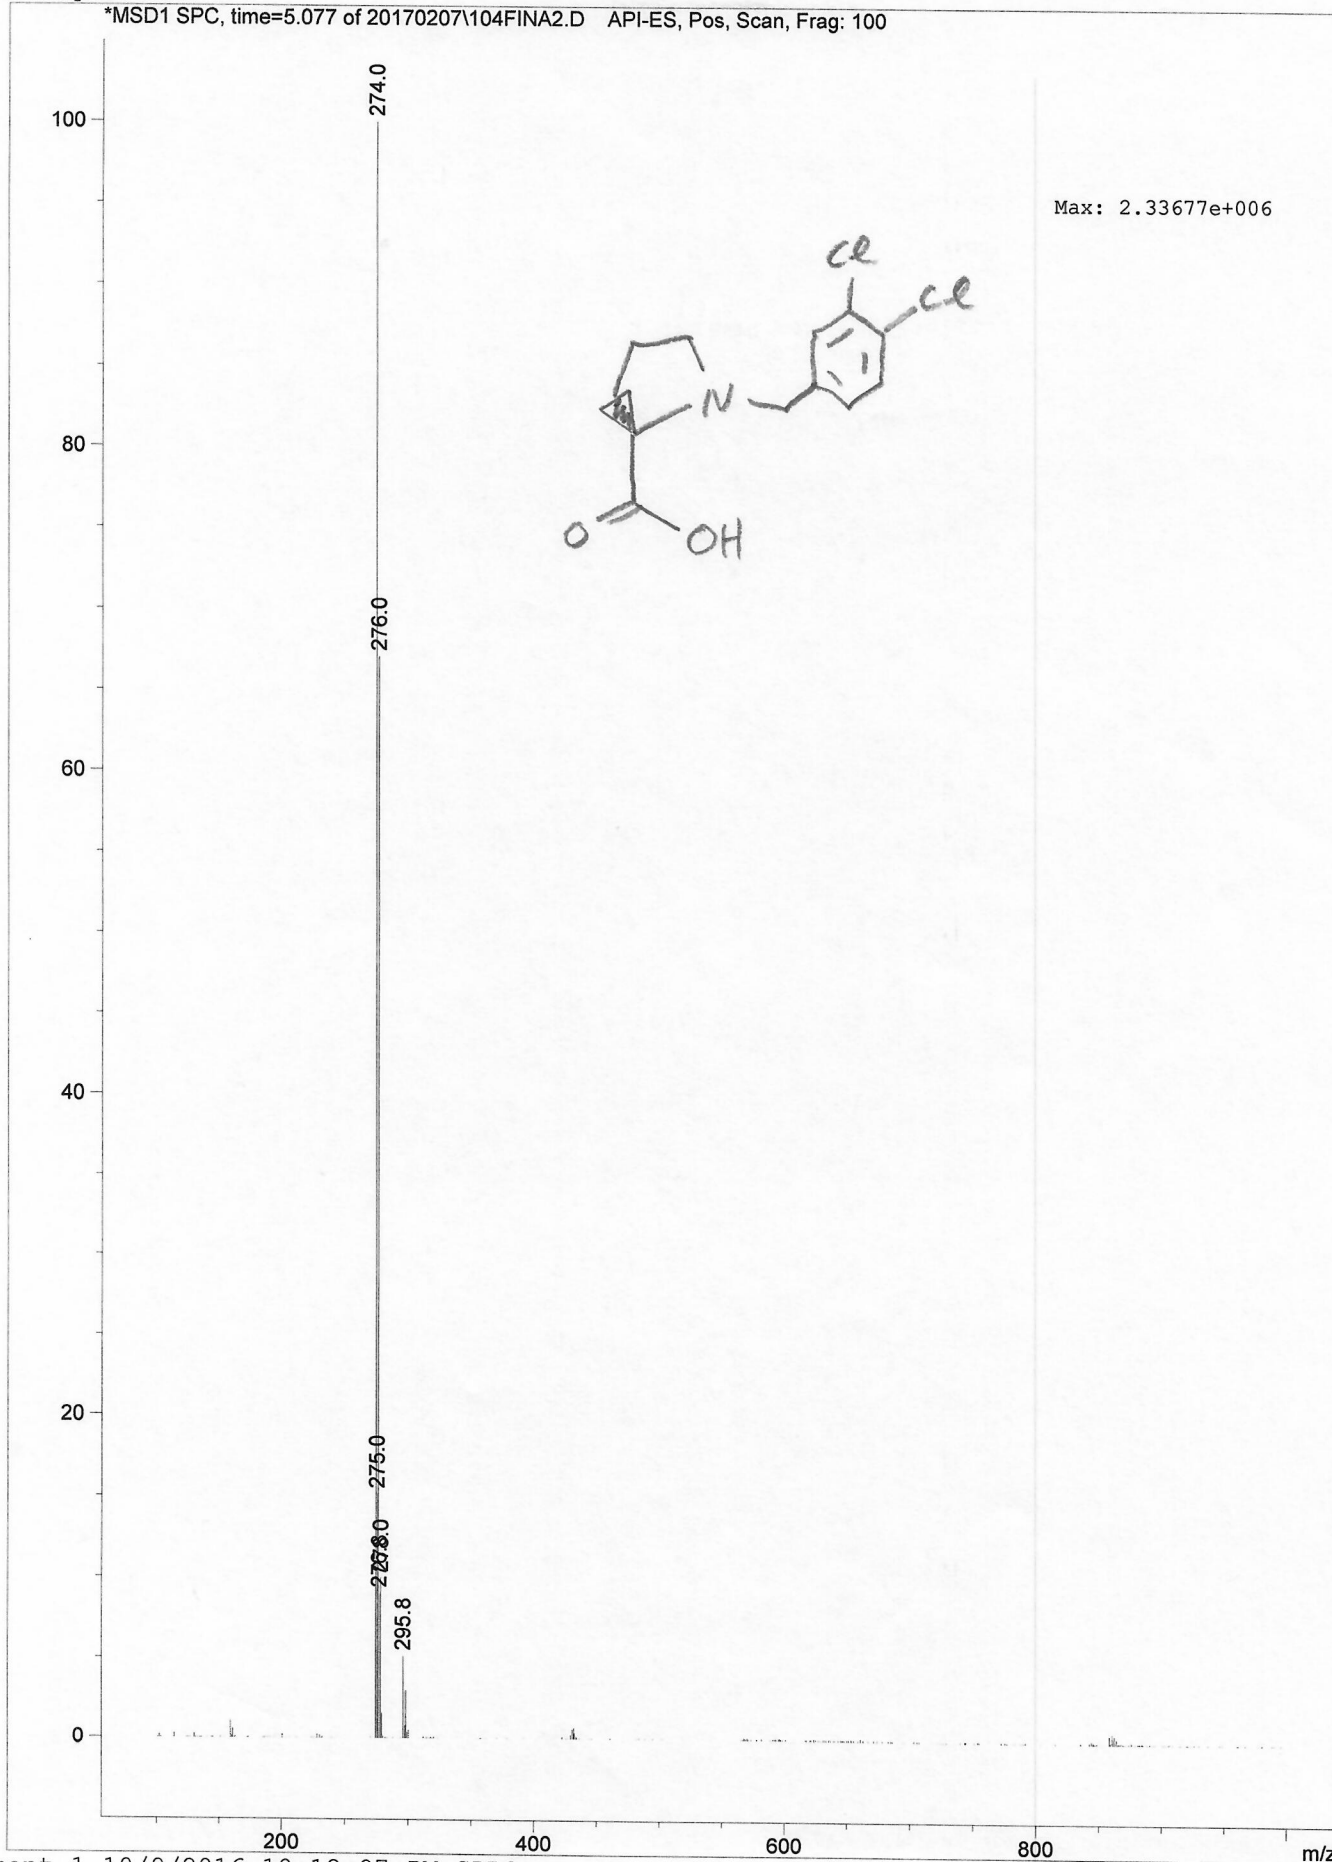

```

=====
Injection Date   : 10/9/2016 5:08:36 AM      Seq. Line   :    1
Sample Name     : 104 KCl 1 mg/mL           Location    : Vial 93
Acq. Operator   : SDRC                      Inj         :    1
                                           Inj Volume  : 5 µl
Acq. Method     : C:\HPCHEM\1\METHODS\AGRADP.M
Last changed    : 10/9/2016 5:57:27 AM by SDRC
Analysis Method : C:\HPCHEM\1\METHODS\ZOLNIAAP.M
Last changed    : 10/9/2016 11:15:23 PM by SDRC
SOL Ni AA Method, Positive Mass
=====

```

*Precipitate in  
(R)-72 formation  
1 mg/mL*

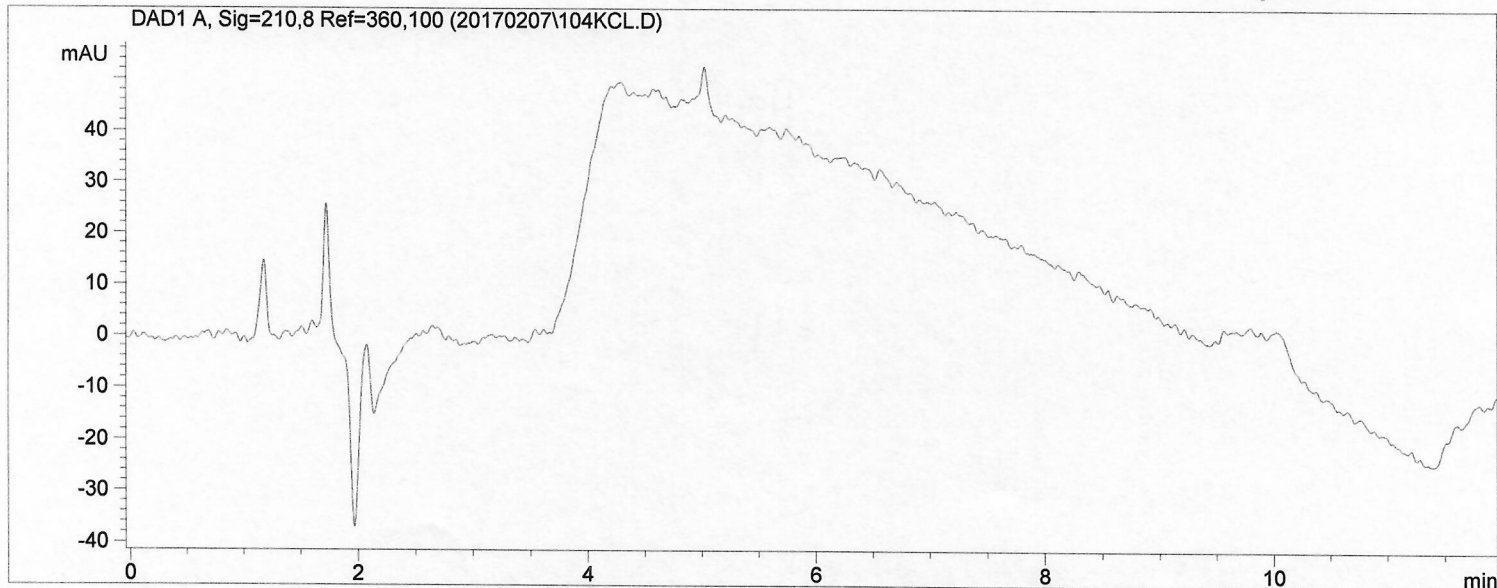

=====  
Area Percent Report  
=====

```

Sorted By       :      Signal
Multiplier      :      1.0000
Dilution       :      1.0000
Use Multiplier & Dilution Factor with ISTDs

```

No peaks found

=====  
\*\*\* End of Report \*\*\*  
=====

```

=====
Injection Date   : 10/9/2016 5:45:05 AM      Seq. Line :    1
Sample Name     : 104 filtrate 20x          Location  : Vial 94
Acq. Operator   : SDRC                      Inj       :    1
                                           Inj Volume: 5 µl

Acq. Method    : C:\HPCHEM\1\METHODS\AGRADP.M
Last changed   : 10/9/2016 5:57:27 AM by SDRC
Analysis Method: C:\HPCHEM\1\METHODS\ZOLNIAAP.M
Last changed   : 10/9/2016 11:15:23 PM by SDRC
SOL Ni AA Method, Positive Mass
=====

```

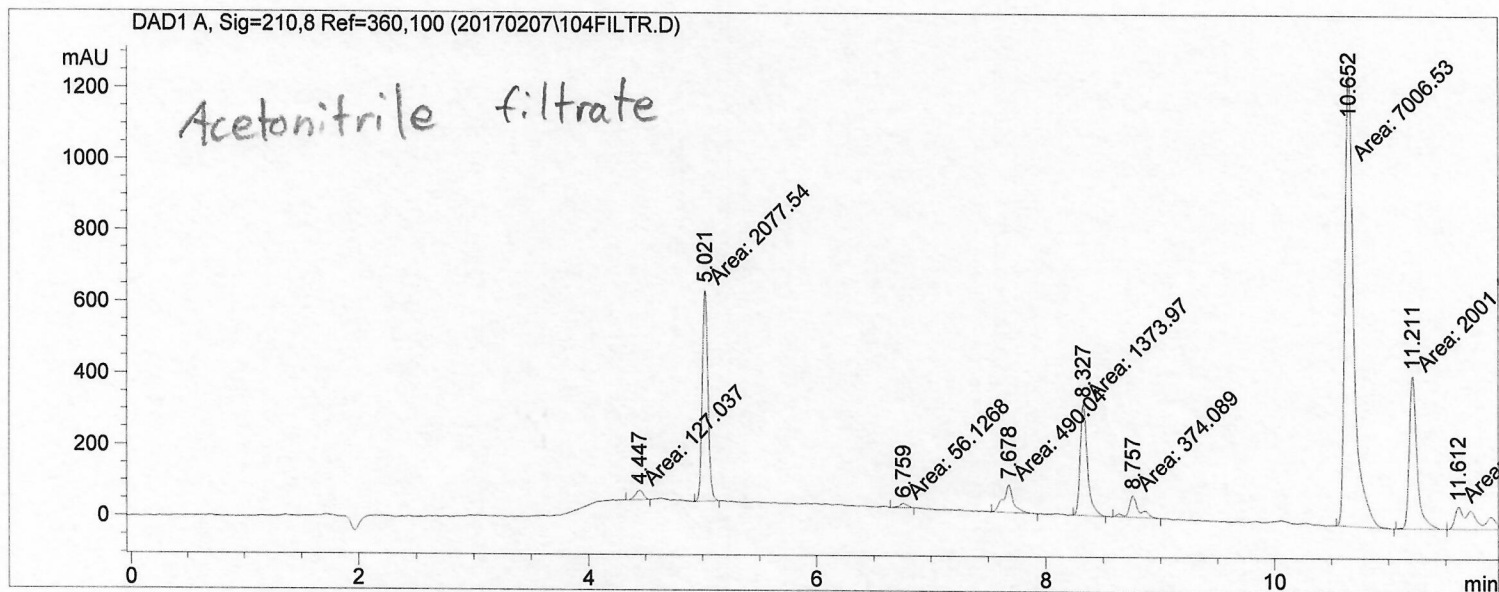

```

=====
Area Percent Report
=====

```

```

Sorted By      : Signal
Multiplier    : 1.0000
Dilution      : 1.0000
Use Multiplier & Dilution Factor with ISTDs

```

Signal 1: DAD1 A, Sig=210,8 Ref=360,100

| Peak # | RetTime [min] | Type | Width [min] | Area [mAU*s] | Height [mAU] | Area %  |
|--------|---------------|------|-------------|--------------|--------------|---------|
| 1      | 4.447         | MM   | 0.0813      | 127.03664    | 26.05042     | 0.8893  |
| 2      | 5.021         | MM   | 0.0583      | 2077.54492   | 593.51038    | 14.5434 |
| 3      | 6.759         | MM   | 0.0789      | 56.12676     | 11.85121     | 0.3929  |
| 4      | 7.678         | MM   | 0.1043      | 490.03979    | 78.28110     | 3.4304  |
| 5      | 8.327         | MM   | 0.0733      | 1373.96558   | 312.57278    | 9.6182  |
| 6      | 8.757         | MM   | 0.1018      | 374.08914    | 61.23238     | 2.6187  |
| 7      | 10.652        | MM   | 0.0923      | 7006.53418   | 1265.51611   | 49.0479 |
| 8      | 11.211        | MM   | 0.0778      | 2001.47607   | 428.71692    | 14.0109 |
| 9      | 11.612        | MM   | 0.2095      | 778.28320    | 61.92008     | 5.4482  |

```
Totals :                1.42851e4  2839.65138
```

```

=====
*** End of Report ***

```

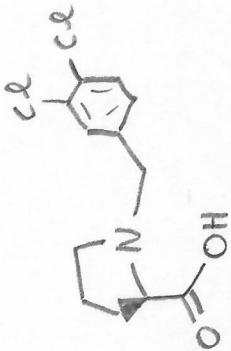

(R)-72

TR-2-104\_final

Sample Name TR-2-104\_final  
Date collected 2017-02-07

Pulse sequence PROTON  
Solvent dmsc

Temperature 21  
Spectrometer hamarimr-inova400

Study owner walkup  
Operator walkup

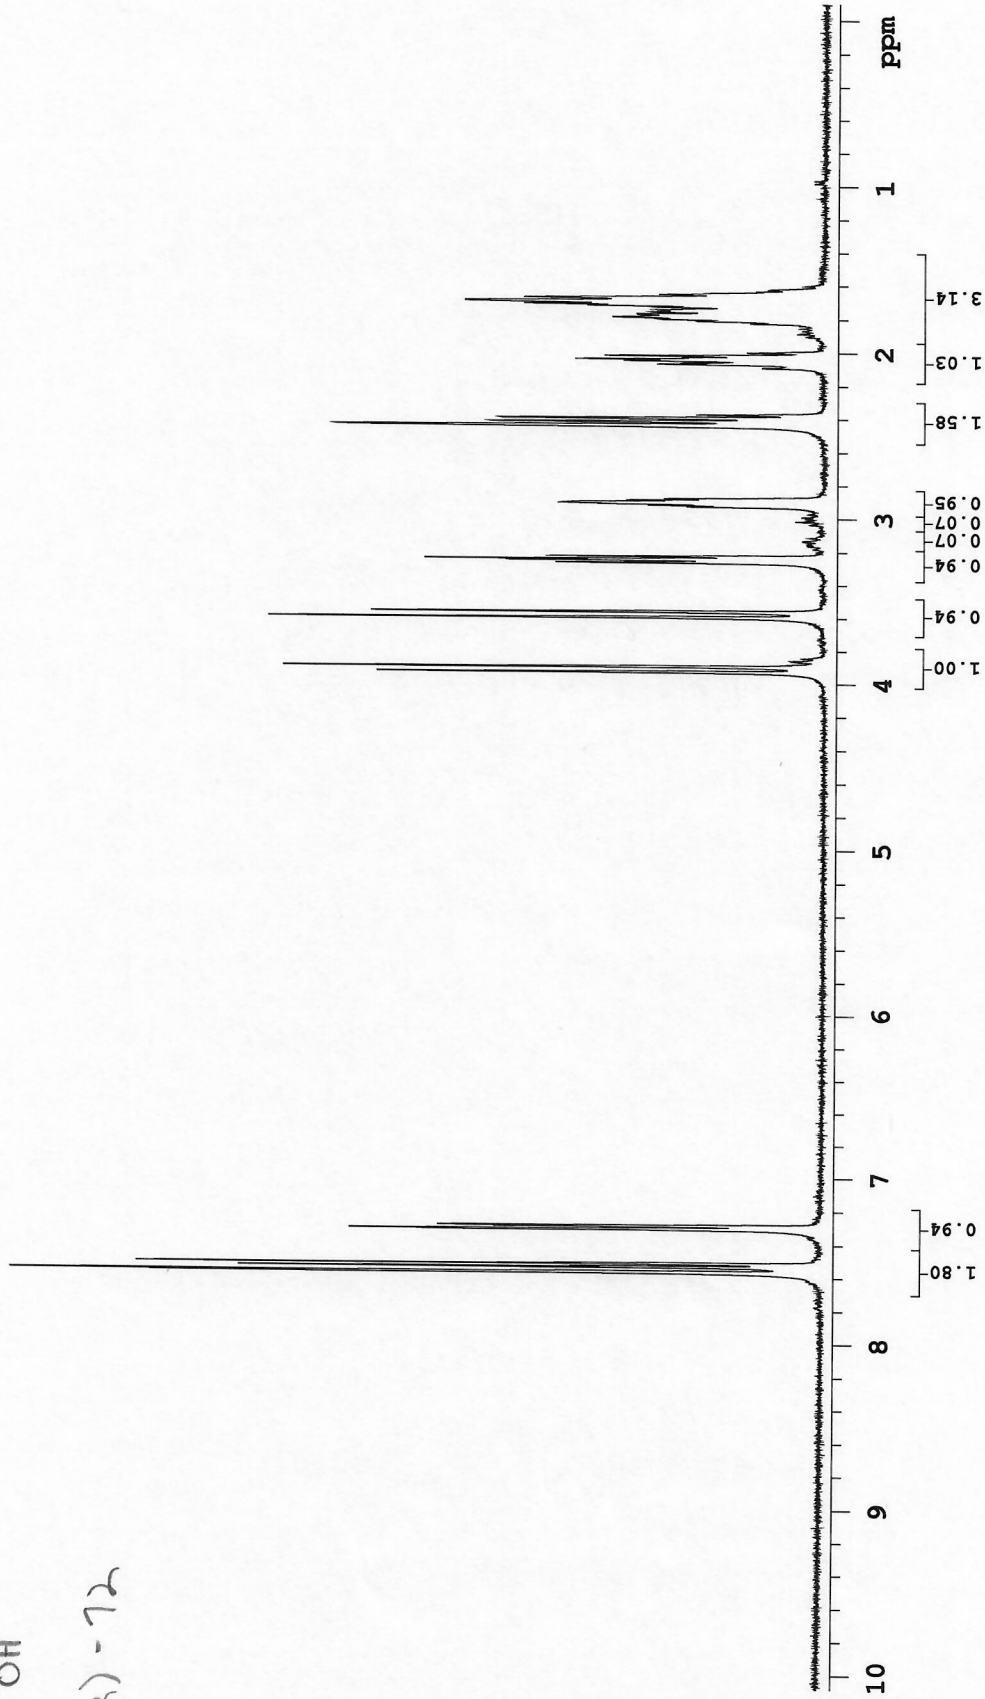

TR-2-104\_final

Sample Name TR-2-104\_final  
Date collected 2017-02-07

Pulse sequence PROTON  
Solvent dmso

Temperature 21  
Spectrometer hamarimr-inova400

Study owner walkup  
Operator walkup

(R) - 72

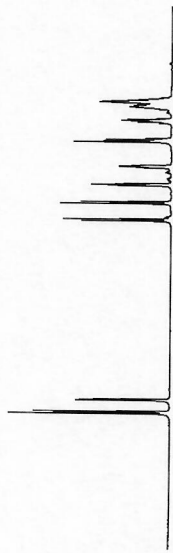

SAMPLE date Feb 7 2017 solvent dmso

file /home/walkup/vnmrs  
vs/data/TR-2-104\_final\_2  
0170207\_01/PROTON\_01.fid

ACQUISITION

sw 6398.5 at 2.561  
np 32768 fb 4000  
bs 32 d1 1.000  
nt 8 ct 8

temp 21.0 gain 42  
spin 20 hst 0.008  
pw90 13.200  
alpha 10.000

FLAGS il n in n  
dp y hs nn

PROCESsing fn not used

DISPLAY sp -40.6  
wip 4073.6  
rfi 799.8  
rfp 0  
rp -143.1  
lp -76.5

PLOT wc 234  
sc 8  
vs 179  
th 20  
ai cdc ph

PRESATURATION n

satmode

PEAK FREQUENCIES(CONTINUED)

| index | freq(ppm) | intensity |
|-------|-----------|-----------|
| 27    | 2.05267   | 27.4737   |
| 28    | 2.0429    | 34.1261   |
| 29    | 2.02142   | 30.04     |
| 30    | 1.80169   | 22.5315   |
| 31    | 1.789     | 28.9817   |
| 32    | 1.7763    | 25.6181   |
| 33    | 1.77044   | 25.6919   |
| 34    | 1.75872   | 23.8264   |
| 35    | 1.74505   | 23.1046   |
| 36    | 1.72845   | 23.2533   |
| 37    | 1.71868   | 32.4792   |
| 38    | 1.70892   | 41.193    |
| 39    | 1.69036   | 49.2401   |
| 40    | 1.67279   | 41.2159   |
| 41    | 1.65228   | 22.5888   |

INTEGRAL VALUES

| Integral | start(ppm) | end       | value  |
|----------|------------|-----------|--------|
| 1        | 10.0849    | 7.69404   | 0.600  |
| 2        | 7.69404    | 7.41426   | 1.796  |
| 3        | 7.41426    | 7.17264   | 0.000  |
| 4        | 7.17264    | 4.01876   | 0.941  |
| 5        | 7.17264    | 3.77713   | -0.656 |
| 6        | 4.01876    | 3.70083   | 1.000  |
| 7        | 3.77713    | 3.47192   | 0.000  |
| 8        | 3.70083    | 3.37018   | 0.936  |
| 9        | 3.47192    | 3.17942   | -0.003 |
| 10       | 3.37018    | 3.17942   | 0.940  |
| 11       | 3.17942    | 3.06497   | 0.000  |
| 12       | 3.17942    | 3.06497   | 0.066  |
| 13       | 3.06497    | 2.97595   | 0.000  |
| 14       | 3.06497    | 2.97595   | 0.066  |
| 15       | 2.97595    | 2.82334   | 0.000  |
| 16       | 2.97595    | 2.82334   | 0.948  |
| 17       | 2.82334    | 2.54356   | -0.025 |
| 18       | 2.54356    | 2.28922   | 1.581  |
| 19       | 2.28922    | 2.17476   | 0.001  |
| 20       | 2.17476    | 1.93313   | 1.025  |
| 21       | 1.93313    | 1.93313   | 0.000  |
| 22       | 1.93313    | 1.39901   | 3.143  |
| 23       | 1.39901    | -0.101625 | -0.231 |

PEAK FREQUENCIES

| index | freq(ppm) | intensity |
|-------|-----------|-----------|
| 1     | 7.57024   | 91.7929   |
| 2     | 7.56536   | 110.958   |
| 3     | 7.53801   | 79.6315   |
| 4     | 7.5302    | 34.1024   |
| 5     | 7.51751   | 93.6756   |
| 6     | 7.50969   | 36.2651   |
| 7     | 7.31047   | 54.4593   |
| 8     | 7.30657   | 64.4881   |
| 9     | 7.28997   | 44.6891   |
| 10    | 7.28606   | 52.3322   |
| 11    | 3.93353   | 61.1436   |
| 12    | 3.90032   | 73.9595   |
| 13    | 3.60052   | 76.0056   |
| 14    | 3.56634   | 61.9644   |
| 15    | 3.26653   | 36.6573   |
| 16    | 3.25189   | 43.4938   |
| 17    | 3.24505   | 54.6467   |
| 18    | 3.2304    | 38.0243   |
| 19    | 2.92474   | 24.0011   |
| 20    | 2.90716   | 35.8565   |
| 21    | 2.89349   | 27.0281   |
| 22    | 2.86372   | 21.8415   |
| 23    | 2.44036   | 67.2116   |
| 24    | 2.41888   | 45.8179   |
| 25    | 2.3974    | 44.4276   |
| 26    | 2.07318   | 22.5885   |

173.69

1701HAMA.358A  
TR-12  
DMSO, C-13  
NUMEGA 3-27-2017

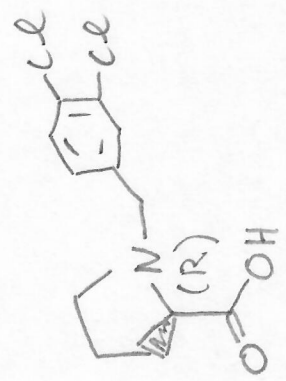

(R)-12

139.37  
130.77  
130.58  
130.29  
129.63  
128.99

65.14  
56.15  
52.66  
40.01  
39.85  
39.68  
39.51  
39.34  
39.17  
39.01  
28.83  
28.72  
22.80

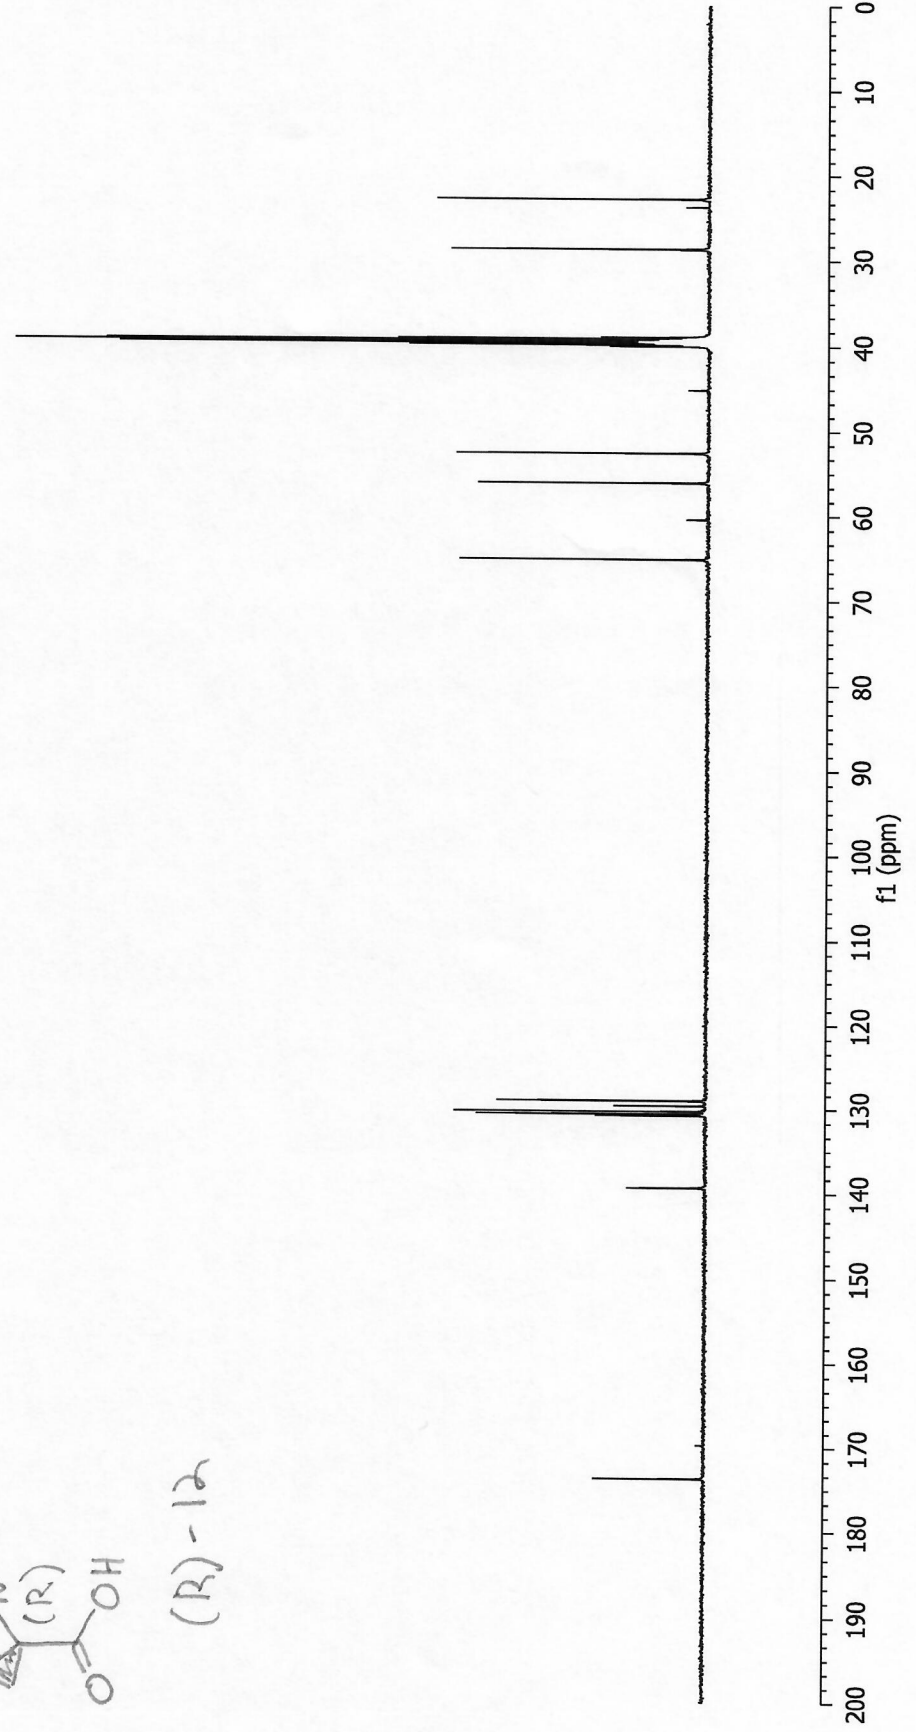

Supplement: op7b00055_si_001.pdf [file op7b00055_si_001.pdf]
